# Supplementary material for: Complete Genomes of Theileria orientalis Chitose and Buffeli Genotypes Reveal within Species Translocations and Differences in ABC Transporter Content
Source: MDPI journal article supplement (doi:10.3390/pathogens11070801), 2022-07-15
Supplement: s1 [file s1]

| <i>Theileria annulata</i> str. Ankara | <i>Theileria equi</i> str. WA | <i>Theileria orientalis</i> str. Shintoku | <i>Theileria orientalis</i> str. Robertson (Ikeda) | <i>Theileria orientalis</i> str. Goon nure (buffeli) | <i>Theileria orientalis</i> str. Fish creek (chitose) |                                                      |
|---------------------------------------|-------------------------------|-------------------------------------------|----------------------------------------------------|------------------------------------------------------|-------------------------------------------------------|------------------------------------------------------|
| 79.56%                                | 70.44%                        | 69.93%                                    | 70.02%                                             | 69.88%                                               | 69.82%                                                | <i>Theileria parva</i> str. Muguga                   |
|                                       | 70.42%                        | 69.97%                                    | 70.16%                                             | 70.00%                                               | 69.95%                                                | <i>Theileria annulata</i> str. Ankara                |
|                                       |                               | 70.27%                                    | 70.06%                                             | 70.70%                                               | 70.58%                                                | <i>Theileria equi</i> str. WA                        |
|                                       |                               |                                           | 99.13%                                             | 81.69%                                               | 81.94%                                                | <i>Theileria orientalis</i> str. Shintoku            |
|                                       |                               |                                           |                                                    | 81.67%                                               | 81.96%                                                | <i>Theileria orientalis</i> str. Robertson (Ikeda)   |
|                                       |                               |                                           |                                                    |                                                      | 85.35%                                                | <i>Theileria orientalis</i> str. Goon nure (buffeli) |

**Figure S1:** Pairwise average nucleotide identities of *Theileria* genomes represented as percentages inferred from pyANI.
