# Supplementary material for: Complete Genomes of Theileria orientalis Chitose and Buffeli Genotypes Reveal within Species Translocations and Differences in ABC Transporter Content
Source: Pathogens. 2022 Jul 15;11(7):801. doi: 10.3390/pathogens11070801 (PMC9323827; doi:10.3390/pathogens11070801)
Supplement: Supplementary file 1 [file pathogens-11-00801-s001.zip › Table S1.xlsx]

## Sheet: Sheet1
Theileria orientalis strain		Fish creek (Chitose)	Goon nure (Buffeli)
Illumina reads (NCBI)	Whole Genome Shotgun accession	MACJ00000000	MACK00000000
	Illumina sequencing platform	HiSeq and MiSeq	HiSeq and MiSeq
	Read length (bp)	150 (HS) and 250 (MS)	150 (HS) and 250 (MS)
	Number of reads	2938990	2940960
	Mean coverage depth (X)	43.5	47.3
	% GC	39.3	39.8
Nanopore reads	Instrument	MinION Mk1B	MinION Mk1B
	Flowcell version	R9.4.1	R9.4.1
	Number of reads	140333	49728
	Bases	3898318767	932427623
	Median Read Length	17395	11643
	Read N50	55090	56470
	Median Read Quality	10.36	10.36
	Mean coverage depth (X)	432.648	103.484
	% GC	38.8	37.4
