# Supplementary material for: Complete Genomes of Theileria orientalis Chitose and Buffeli Genotypes Reveal within Species Translocations and Differences in ABC Transporter Content
Source: Pathogens. 2022 Jul 15;11(7):801. doi: 10.3390/pathogens11070801 (PMC9323827; doi:10.3390/pathogens11070801)
Supplement: Supplementary file 1 [file pathogens-11-00801-s001.zip › Table S2.xlsx]

## Sheet: Sheet1
Isolate group	Orthogroup	# genes in orthogroup	Notes
Chitose/Buffeli	N8.HOG0000001	74	ABC Transporters
Chitose/Buffeli	N8.HOG0000709	12	Category S - ENOG503KDY7 --> Theileria associated unknown function
Chitose/Buffeli	N8.HOG0003116	8	Uncategorised - ENOG50 5-10 transmembrane domains
Chitose/Buffeli	N8.HOG0000090	7	Mix Category S/Uncategorised - Mix of ENOG503KDY7 and ENOG502RZ20 no transmembrane domains generally
Chitose/Buffeli	N8.HOG0000000	6	ABC Transporters
Chitose/Buffeli	N8.HOG0000046	6	Category S - DUF529/FAINT proteins
Chitose/Buffeli	N8.HOG0003232	6	Apicoplast hypothetical proteins (no category) 1-3 transmembrane domains
Chitose/Buffeli	N8.HOG0003358	6	Uncategorised - ENOG50 - 5 in Chitose one in Buffeli - Buffeli has 5 transmembrane domains Chitose 1-3
Chitose/Buffeli	N8.HOG0003484	5	Category S - ENOG503KDY7 --> Theileria associated unknown function
Chitose/Buffeli	N8.HOG0000028	4	Category S - DUF529/FAINT proteins
Chitose/Buffeli	N8.HOG0003527	4	Category S - ENOG503KDY7 --> Theileria associated unknown function
Chitose/Ikeda	N8.HOG0000034	28	ABC Transporters
Chitose/Ikeda	N8.HOG0002500	7	Category S - ENOG503KDY7 --> Theileria associated unknown function
Chitose/Ikeda	N8.HOG0000133	5	Category S - DUF529/FAINT proteins
Chitose/Ikeda	N8.HOG0000015	4	Category S - DUF529/FAINT proteins
Chitose/Ikeda	N8.HOG0000016	4	Category S - DUF529/FAINT proteins
